# Supplementary material
Source: HighWire-hosted journal article supplement (https://jnm.snmjournals.org/highwire/filestream/93891/field_highwire_adjunct_files/0/39859_supplemental_figures.pdf)
Supplement: 39859_supplemental_figures.pdf [file 39859_supplemental_figures.pdf]

**Supplemental Figure 1.** Estimated  $IC_{50}$  value for the RGD multimers based on the cell adhesion assay. By assuming that all the cells adhered at  $1 \times 10^{-9}$  mol/L and only 10% of the cells adhered at  $1 \times 10^{-4}$  mol/L, the estimated  $IC_{50}$  values for RGD monomer, dimer, tetramer, and octamer were  $(2.71 \pm 0.72) \times 10^{-6}$ ,  $(6.95 \pm 0.99) \times 10^{-7}$ ,  $(3.23 \pm 0.85) \times 10^{-7}$  and  $(1.06 \pm 0.22) \times 10^{-7}$  mol/L, respectively.

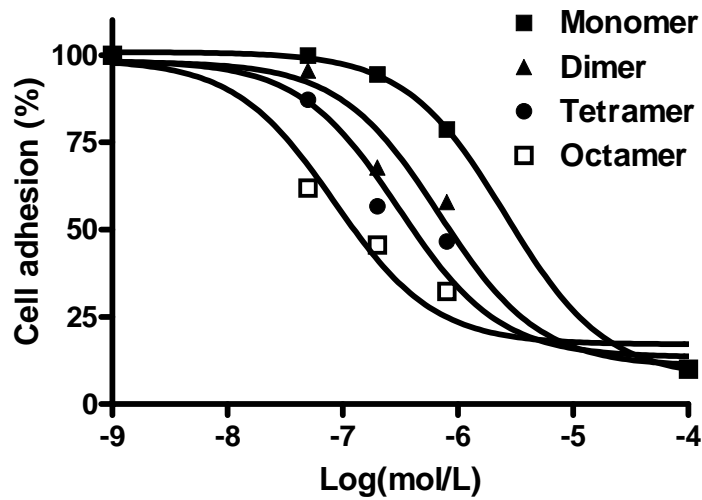

**Supplemental Figure 2.** Immunofluorescence mouse  $\beta_3$  staining of frozen U87MG tumor and kidney sections (5  $\mu\text{m}$  thick). Note that only the vessels of the U87MG tumor sections are stained (the U87MG tumor cells are human integrin  $\alpha_v\beta_3$ -positive). From the staining results, it is clear that kidney has strong integrin  $\alpha_v\beta_3$  expression.

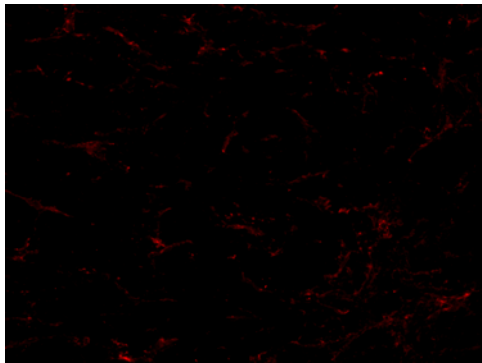

**U87MG**

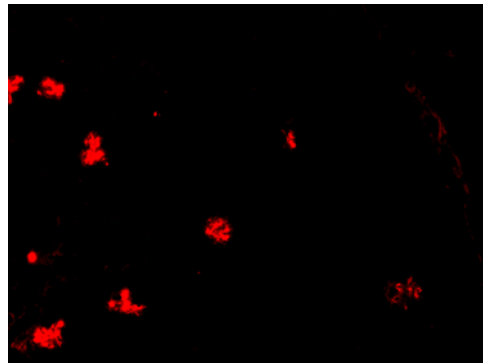

**Kidney**
